# Supplementary material for: Boosted charge extraction of NbOx-enveloped SnO2 nanocrystals enables 24% efficient planar perovskite solar cells
Source: Royal Society of Chemistry journal article supplement (doi:10.1039/d1ee01519b), 2021-01-01
Supplement: d1ee01519b3.pdf [file d1ee01519b3.pdf]

## Electronic Supplementary Information

### Boosted Charge Extraction of NbO<sub>x</sub>-Enveloped SnO<sub>2</sub> Nanocrystals Enable 24% Efficient Planar Perovskite Solar Cells

Ruihan Yuan,<sup>‡a</sup> Bing Cai,<sup>‡a</sup> Yinhua Lv,<sup>\*a</sup> Xiang Gao,<sup>b</sup> Jinwen Gu,<sup>c</sup> Zhenghui Fan,<sup>a</sup> Xinhang Liu,<sup>a</sup> Chi Yang,<sup>d</sup> Mingzhen Liu<sup>\*c</sup> and Wen-Hua Zhang<sup>\*a</sup>

<sup>a</sup> Sichuan Research Center of New Materials, Institute of Chemical Materials, China Academy of Engineering Physics, 596 Yinhe Road, Shuangliu, Chengdu 610200, China. E-mail: [qiehahah@163.com](mailto:qiehahah@163.com); [whzhang@caep.cn](mailto:whzhang@caep.cn)

<sup>b</sup> Center for High Pressure Science & Technology Advanced Research, 10 Xibeiwang East Road, Haidian District, Beijing 100094, P.R. China.

<sup>c</sup> School of Materials and Energy, University of Electronic Science and Technology of China, Chengdu 611731, P.R. China. E-mail: [mingzhen.liu@uestc.edu.cn](mailto:mingzhen.liu@uestc.edu.cn)

<sup>d</sup> Institute for Advanced Study, Chengdu University, 2025 Chengluo Avenue, Chengdu, 610106, China.

<sup>‡</sup> These authors contributed equally to this work.

<sup>\*</sup> Corresponding author.

## Experimental Procedures

**Materials.** All of the solvents and reagents were used as received without further purification. Tin (IV) chloride pentahydrate ( $\text{SnCl}_4 \cdot 5\text{H}_2\text{O}$ , 99.0%), HAc (AR) and Ammonia solution (AR) were purchased from Sinopharm Chemical Reagent Co. Ltd. Concentrated HCl (36.5-38 wt%, GR) were purchased from Xilong Scientific Co. Ltd. Niobium(V) chloride (99.9%) was purchased from Alfa Aesar Co. Ltd. Ethanol (99.5%), and EG (99%) were purchased from Aladdin Reagent Co. Ltd.  $\text{PbI}_2$  was bought from TCI Co. Ltd. FAI, MABr, MAcl, CsI, and 2,2',7,7'-tetrakis[N,N-di(4-methoxyphenyl)amino]-9,9'-spirobifluorene (Spiro-OMeTAD) were all purchased from Xi'an Polymer Light Technology Corp. Li-TFSI, 4-tert-butylpyridine (tBP), N, N- dimethyl methanamide (DMF) and dimethyl sulfoxide (DMSO) were purchased from Sigma Aldrich. The indium tin oxide (ITO) glass is a commercial product from South China Science and Technology Company Limited (China). The polyethylene naphthalate (PEN)/ITO was purchased from Advanced Election Technology Co. Ltd.

**Preparation of the  $\text{SnO}_2$  NCs.**  $\text{SnO}_2$  NCs were prepared according to a modified method.<sup>1</sup> Typically, 5 g of  $\text{SnCl}_4 \cdot 5\text{H}_2\text{O}$  was first dissolved in 50 mL of EG and stirred overnight. Then 10 mL of the above solution was pipetted into a round-bottomed flask, and 2 mL of HAc and ammonia solution were added into it under stirring. After cooling down to room temperature, the round-bottomed flask was placed in an oil bath and heated for tens of minutes at 150 °C. Then the solution was centrifuged with ethanol at 2500 rpm for twice and 5000 rpm for twice. Finally, the centrifuge products were dispersed into 30 mL of ethanol to form a  $\text{SnO}_2$  NC dispersed solution with a concentration of 13 mg/mL.

**Preparation of "Enveloped"  $\text{SnO}_2$  ( $\text{SnO}_2/\text{NbO}_x$ ).** 2 mL of  $\text{SnO}_2$  NCs-ethanol solution was added into 8 mL of  $\text{NbCl}_5$  solution (0.02 M aqueous solution with 0.5 mL of HCl). After mixing well, the beaker was placed in an oil bath and heated for varied reaction time at 70 °C. Then the solution was centrifuged with ethanol at 3500 rpm for twice. The centrifuge products were dispersed into 5 mL ethanol and the solution was dispersed by ultrasound machine before use.

**Device Fabrication.** The ITO glass substrates and PEN/ITO flexible substrates were sequentially cleaned with water and ethanol. The  $\text{SnO}_2$  NCs and  $\text{SnO}_2/\text{NbO}_x$  films were fabricated by spin coating their corresponding dispersions machine at 2000 rpm with an acceleration of 2000 rpm/s, and annealed at 150 °C for 30 minutes (for the flexible substrates, the annealing temperature was 100 °C). After cooling down to room temperature, the substrates were treated with UV-O for 15 min before use. The perovskite films were prepared via a two-step spin-coating method.<sup>2</sup> 1.5 M of  $\text{PbI}_2$  in DMF: DMSO solution (9:1, v/v) was spin-coated onto  $\text{SnO}_2$  NCs or  $\text{SnO}_2/\text{NbO}_x$  substrates at 1500 rpm for 30 s to form a yellow  $\text{PbI}_2$ -DMSO film and heated at 70 °C for 10 s. After cooled down to room temperature, 0.05 mL of 2-propanol solution containing 90 mg of FAI, 6.36 mg of MAI and 9 mg of MAcl, was spin-coated atop  $\text{PbI}_2$ -DMSO film at 2000 rpm for 30 s. Then the films annealed on a hot plate at 150 °C for 20 min in ambient air conditions (for the flexible substrates, the heating temperature was 120 °C). After cooling down to room temperature, the hole transport material solution was spin coated onto perovskite films at 4500 rpm for 30 s, which was consisted with 72.3 mg Spiro-OMeTAD, 28.8  $\mu\text{L}$  4-tert-butylpyridine, 17.5  $\mu\text{L}$  Li-TFSI/acetonitrile (520 mg/mL), and 1 mL chlorobenzene. Finally, 80 nm of gold top electrode was thermally evaporated under high vacuum.

**Characterizations.** Photovoltaic performance of solar cell devices was measured under illumination of a simulated sunlight (AM 1.5, 100 mW/cm<sup>2</sup>, SSF5-3A, Enlitech), and the *J-V* curves were recorded using a Keithley digital source meter (Model 2400). The active area of the solar cells was confirmed by using a metal aperture of 0.09 cm<sup>2</sup> to avoid light scattering through the sides. The external quantum efficiencies were measured in AC mode by a QE-R3011 testing system (Enlitech). The PL measurement was performed with time-correlated single photon counting (TCSPC) with a 510 nm laser (DD-510L, Deltaflex, Horiba). An Keysight Technologies 7500 (AFM) was used to obtain surface RMS roughness of SnO<sub>2</sub> NCs, SnO<sub>2</sub>/NbO<sub>x</sub>, and perovskite films. X-ray diffraction (XRD) patterns were recorded by a D8 X-ray diffractometer (X' pert Pro-1), employing Cu K<sub>α</sub> as incident radiation. The morphologies of the samples were obtained by scanning electron microscopy (Hitachi S5200 and Sigma HD, Zeiss) and transmission electron microscope (TEM; JEOL, JEM-2100, 200 KV). The absorption and transmission were checked by a UV–VIS spectrophotometer (Evolution™ 201, Thermo fisher scientific Corporation). The XPS result was obtained by Thermo ESCALAB 250Xi. The energy band structure of samples was evaluated by an ultraviolet photoemission spectroscopy (UPS) (Thermo Scientific, Escalab 250Xi). The linear sweep voltammetry, electrochemical impedance, admittance spectroscopy measurement and Mott-Schottky analysis were conducted by using a multi-channel potentiometer (VMP3, Biologic). During the Mott-Schottky measurement, the electrodes were submerged in a 0.1 M NaCl aqueous solution, with a Pt and Ag/AgCl as counter and reference electrode, respectively. The values were recorded at frequency of 80 mHz. EIS data were recorded from 0 to 0.6 V in the frequency range from 1 MHz to 100 mHz with an AC amplitude of 10 mV. The Mott-Schottky data were recorded at the frequency of 50 KHz in the applied voltage range from -1.5 V to 0 V with an AC amplitude of 25 mV. IMPS/IMVS methods were performed using an impedance analyzer (Modulab XM, Solartron Metrology) under illumination (yellow-emitting LED,  $\lambda$  = 590 nm). The mean transport ( $\tau_{ct}$ ) and recombination times ( $\tau_r$ ) of the photogenerated charges were obtained from the IMVS/IMPS curves by setting  $\tau = 1/2\pi f_{min}$  (IMPS, IMVS), respectively. The contact angel test was conducted by using Contact Angle measuring instrument (Dataphysics OCA50), and the solvent used for the test was PbI<sub>2</sub>-precursor solution (DMF/DMSO, 9:1, v/v). For the light soaking stability test, unencapsulated PSCs were placed in a N<sub>2</sub>-filled glove box under one sun irradiation at the open circuit condition. The chamber atmosphere temperature is controlled at 30±5 °C.

**Explanation of the movies.** Movies 1 and 2 display the contact angels test results of PbI<sub>2</sub> precursor solution on the SnO<sub>2</sub>/NbO<sub>x</sub>, SnO<sub>2</sub> NCs film substrates.

## Supplementary figures and tables

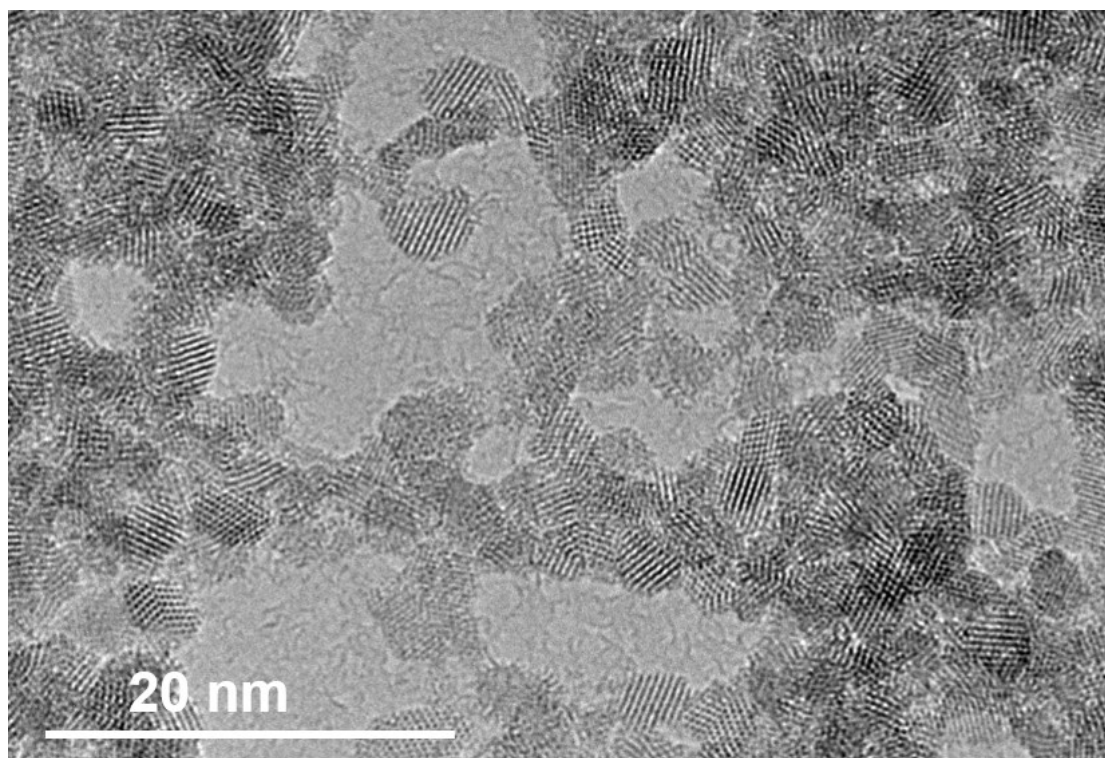

**Figure S1.** The TEM image of SnO<sub>2</sub> NCs.

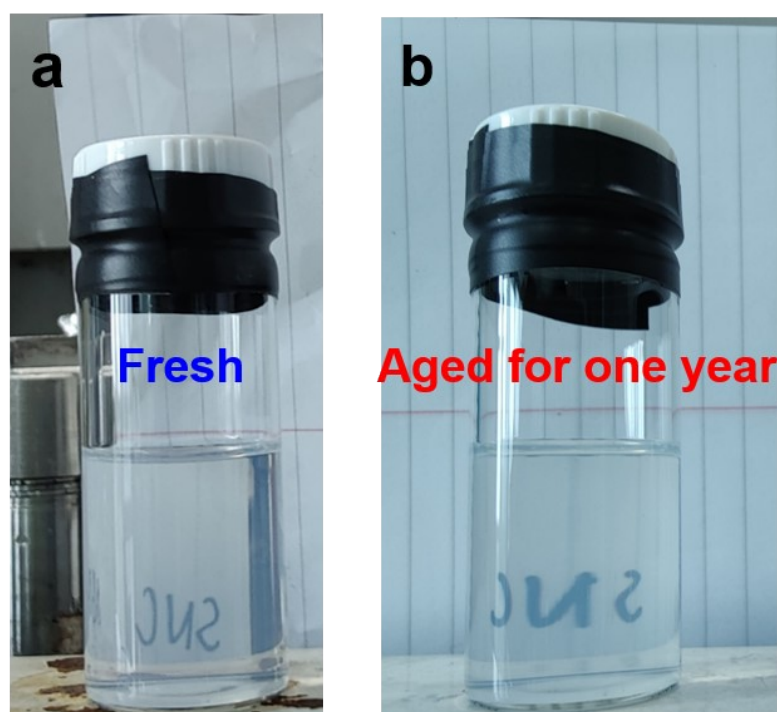

**Figure S2.** The digital photos of the fresh (a) and aged (b) SnO<sub>2</sub> NC dispersion solutions (concentration of 13 mg/mL) in a refrigerator for one year.

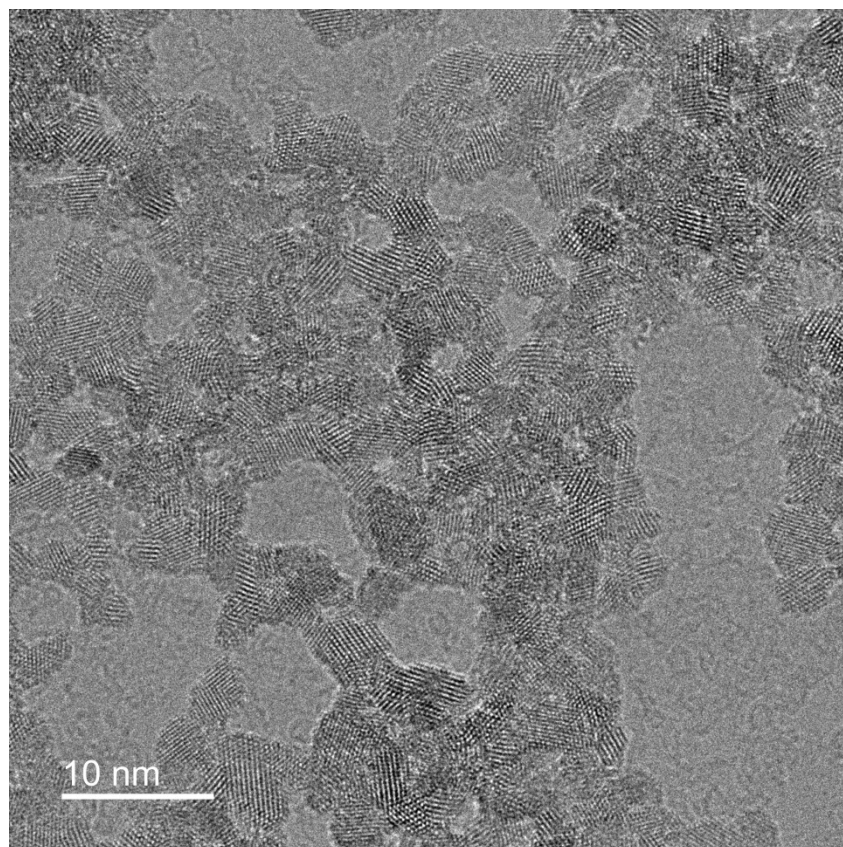

**Figure S3.** The HRTEM images of SnO<sub>2</sub> NCs aged in a refrigerator for one year.

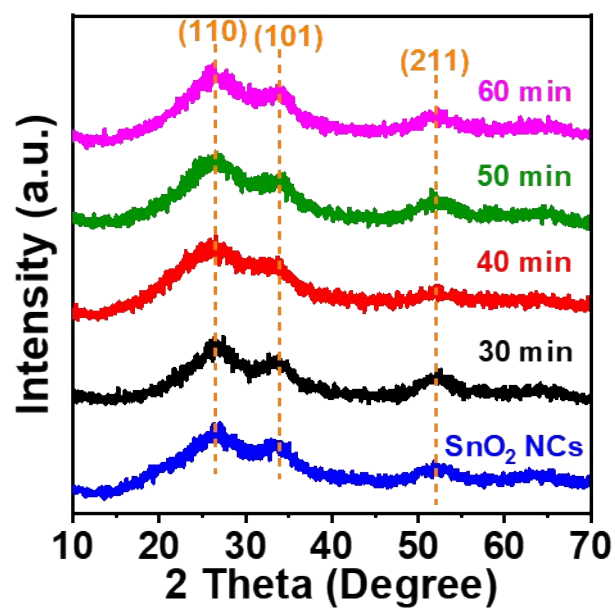

**Figure S4.** XRD patterns of SnO<sub>2</sub> and SnO<sub>2</sub>/NbO<sub>x</sub> NCs with different growth time of NbO<sub>x</sub>.



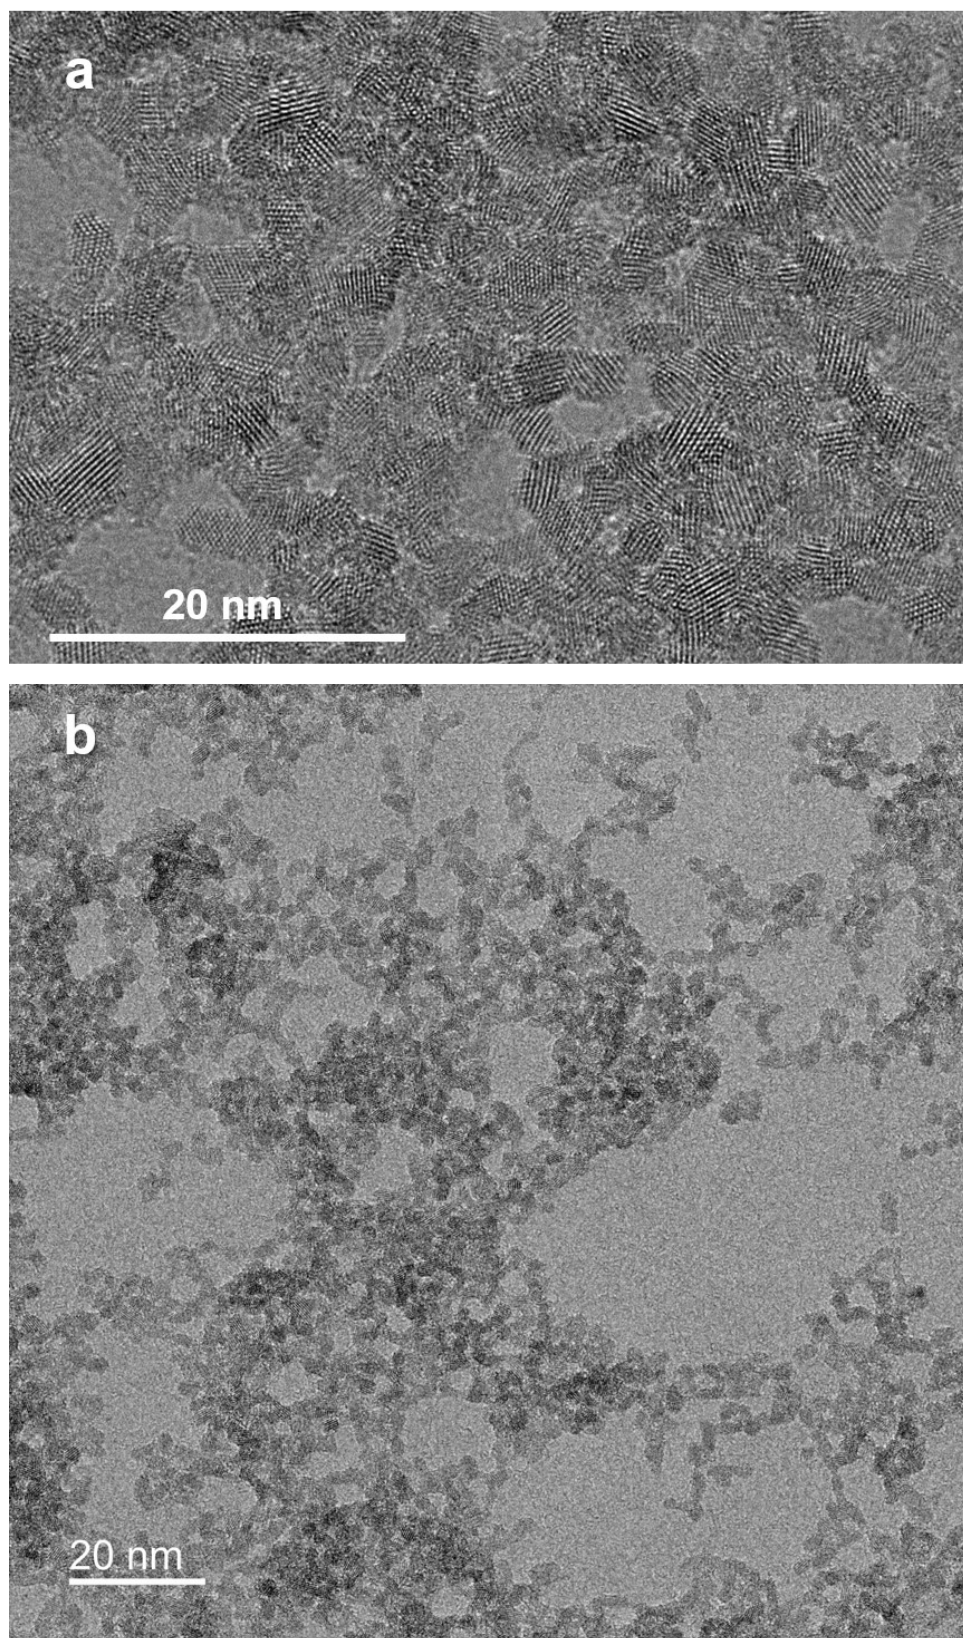

**Figure S5.** The TEM images of the  $\text{SnO}_2/\text{NbO}_x$  NCs.

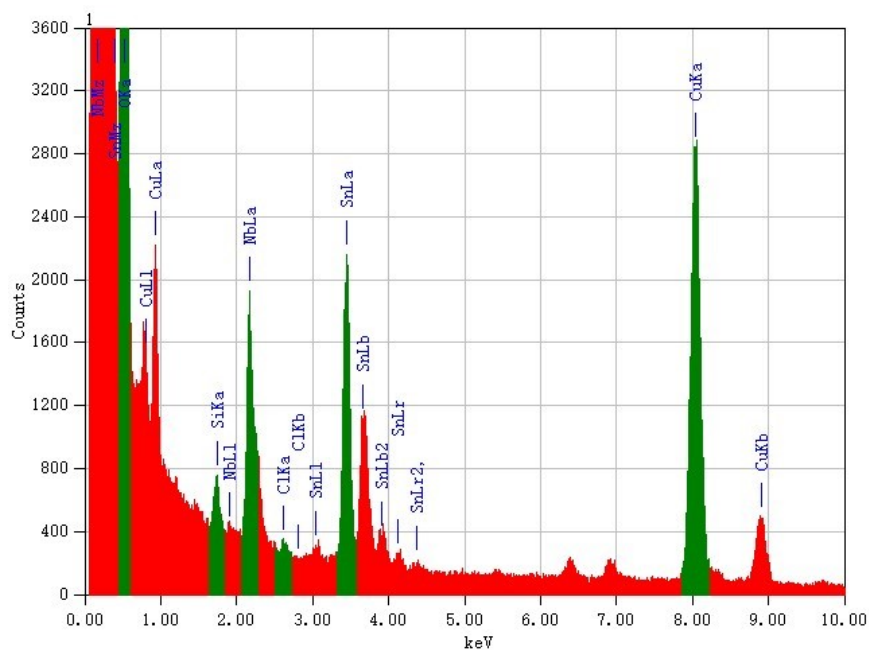

**Figure S6.** The EDX spectrum of  $\text{SnO}_2/\text{NbO}_x$  NCs.

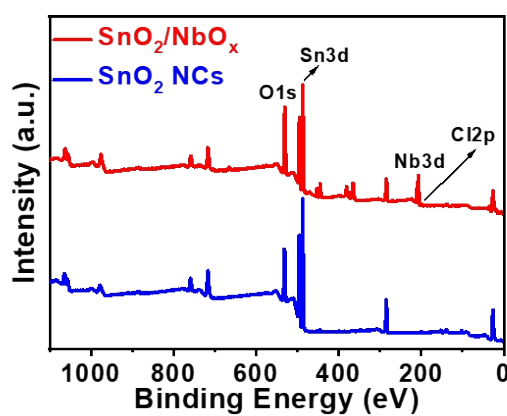

**Figure S7.** The XPS survey spectra of the  $\text{SnO}_2$  and  $\text{SnO}_2/\text{NbO}_x$  NCs.

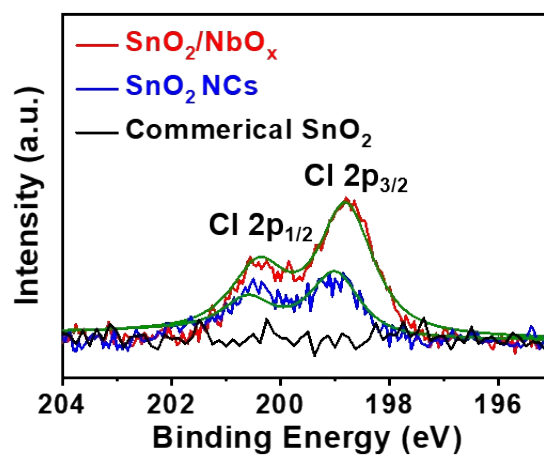

**Figure S8.** The high-resolution XPS spectra of Cl 2p of Commercial  $\text{SnO}_2$ ,  $\text{SnO}_2$  NCs, and  $\text{SnO}_2/\text{NbO}_x$  NCs.

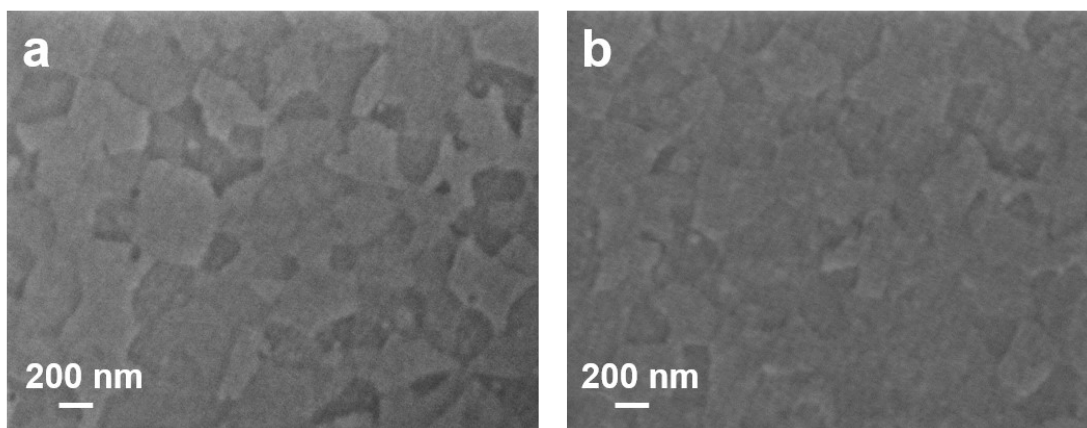

**Figure S9.** The SEM images of compact films on ITO substrates: (a)  $\text{SnO}_2$  and (b)  $\text{SnO}_2/\text{NbO}_x$  NCs.

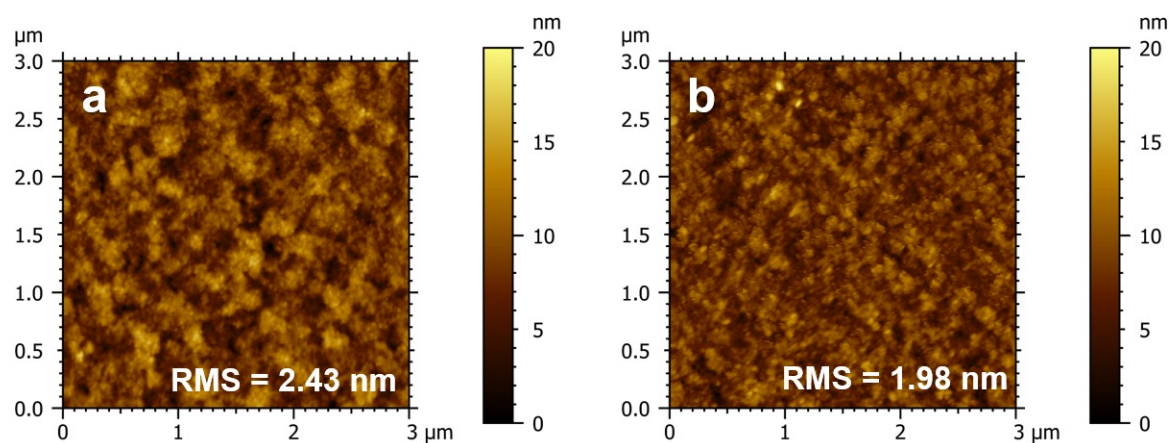

**Figure S10.** The AFM images of compact films on ITO substrates: (a)  $\text{SnO}_2$  and (b)  $\text{SnO}_2/\text{NbO}_x$  NCs.

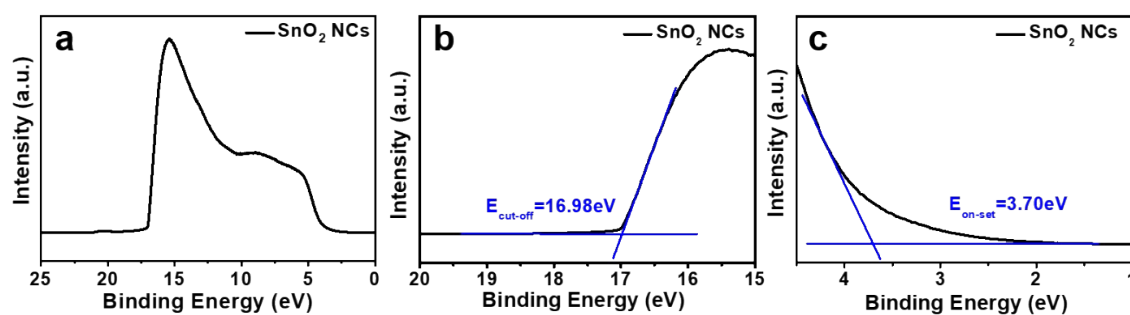

**Figure S11.** The UPS spectra of  $\text{SnO}_2$  NCs: (a) full range, (b) cut-off energies ( $E_{\text{cut-off}}$ ), and (c) on-set energies ( $E_{\text{on-set}}$ ).



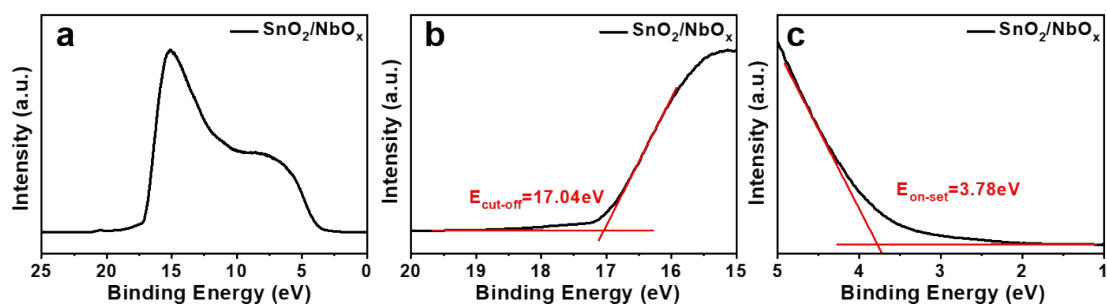

**Figure S12.** The UPS spectra of  $\text{SnO}_2/\text{NbO}_x$  NCs: (a) full range, (b) cut-off energies ( $E_{\text{cut-off}}$ ), and (c) on-set energies ( $E_{\text{on-set}}$ ).

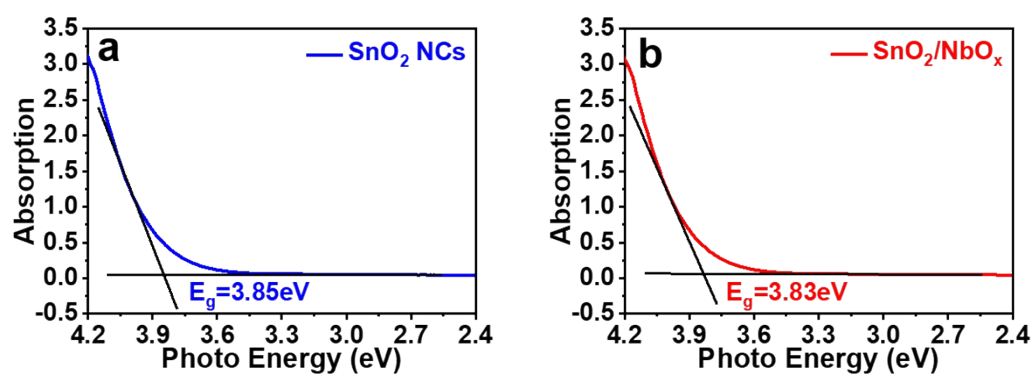

**Figure S13.** The UV-Vis absorption spectra of compact films on ITO substrates: (a)  $\text{SnO}_2$  and (b)  $\text{SnO}_2/\text{NbO}_x$  NCs.

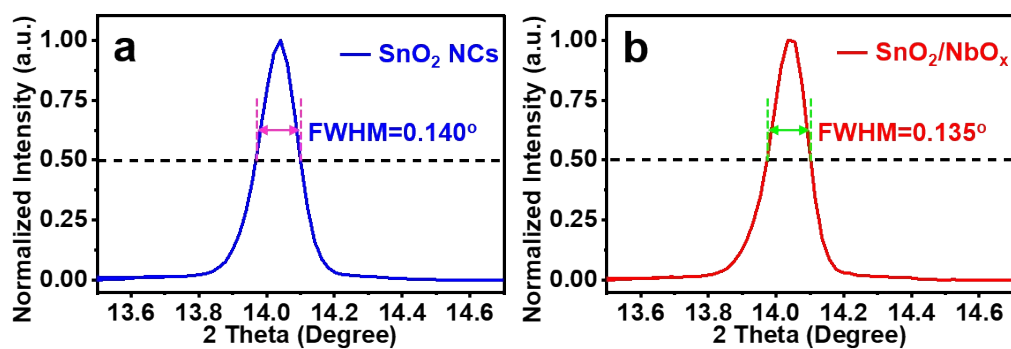

**Figure S14.** The full width at half maximum (FWHM) of (100) plane for perovskite films based on: (a)  $\text{SnO}_2$  and (b)  $\text{SnO}_2/\text{NbO}_x$  NCs.

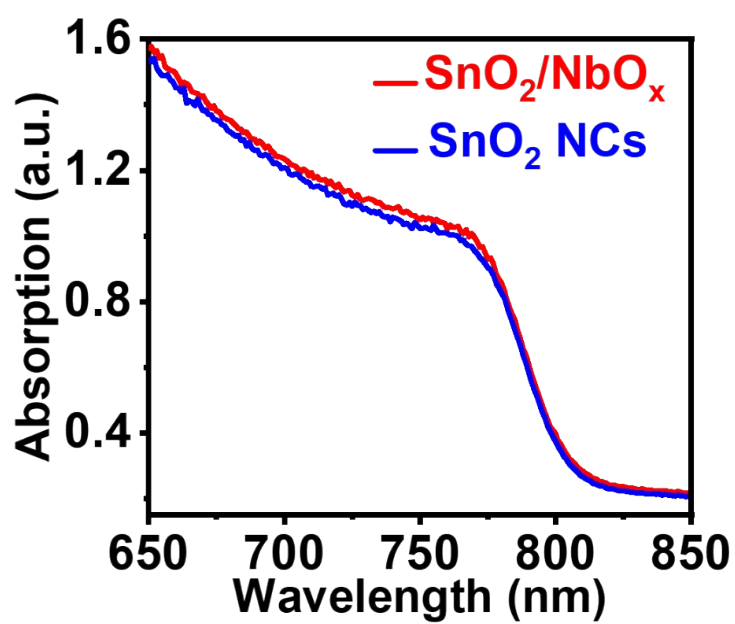

**Figure S15.** The UV-Vis absorption spectra of perovskite films on  $\text{SnO}_2$  and  $\text{SnO}_2/\text{NbO}_x$  NC ETMs.

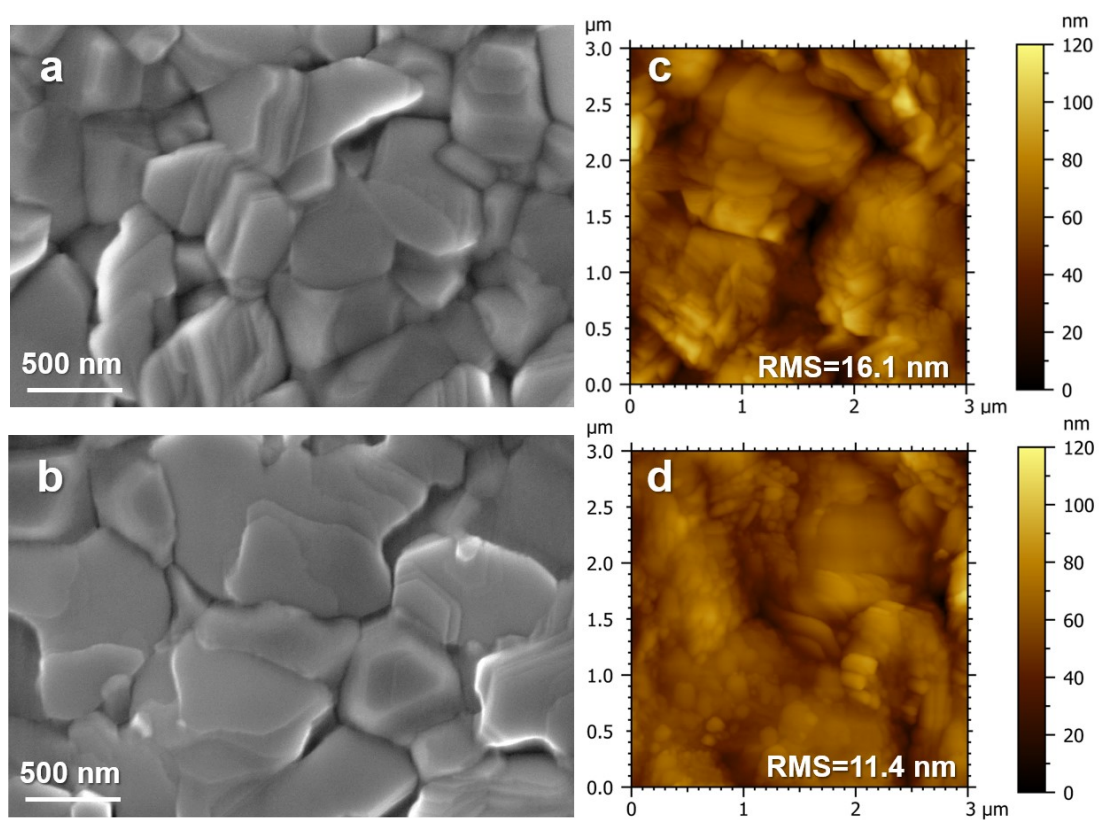

**Figure S16.** Morphologies of perovskite films on different ETMs: (a, c)  $\text{SnO}_2$  and (b, d)  $\text{SnO}_2/\text{NbO}_x$  NCs.

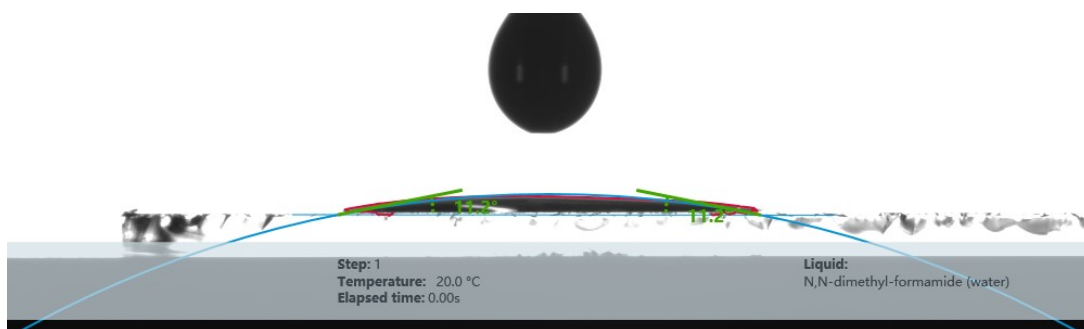

**Figure S17.** The contact angle of the  $\text{PbI}_2$  solution on the commercial  $\text{SnO}_2$  film.

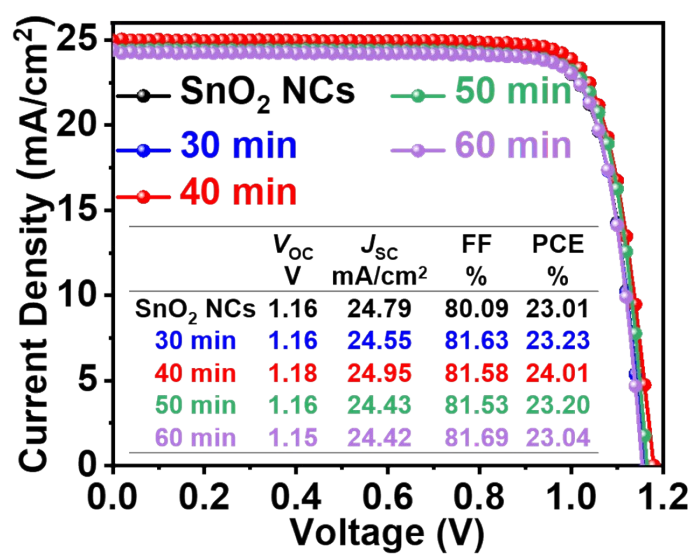

**Figure S18.** The  $J$ - $V$  curves of devices based on  $\text{SnO}_2/\text{NbO}_x$  ETMs with different enveloping periods of  $\text{NbO}_x$  layer.

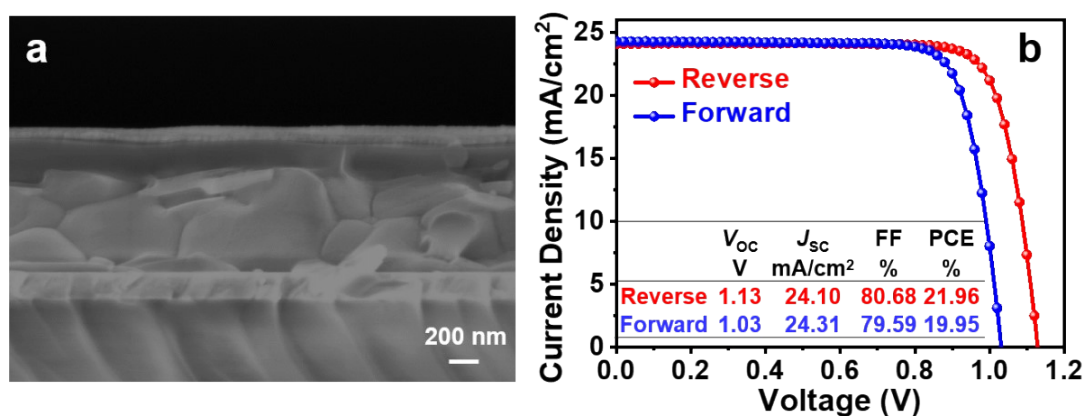

**Figure S19.** The characteristics of devices based on commercial  $\text{SnO}_2$ : (a) the cross-sectional SEM image of PSCs and (b) the  $J$ - $V$  curves.

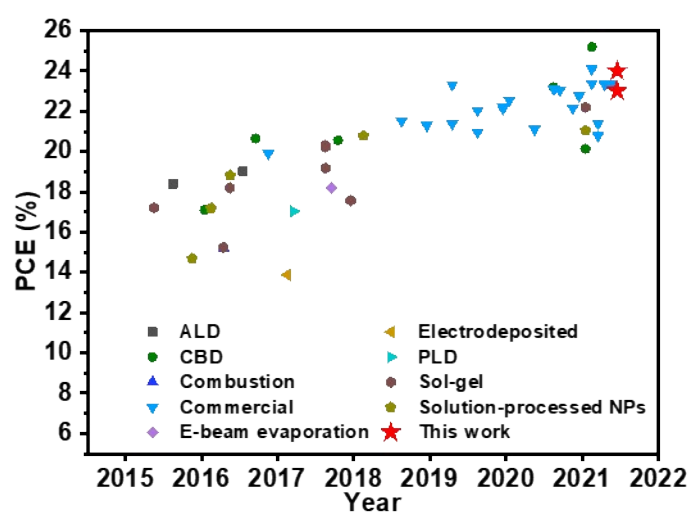

**Figure S20.** Schematic diagram of efficiency development of planar n-i-p PSCs based on  $\text{SnO}_2$  ETMs.

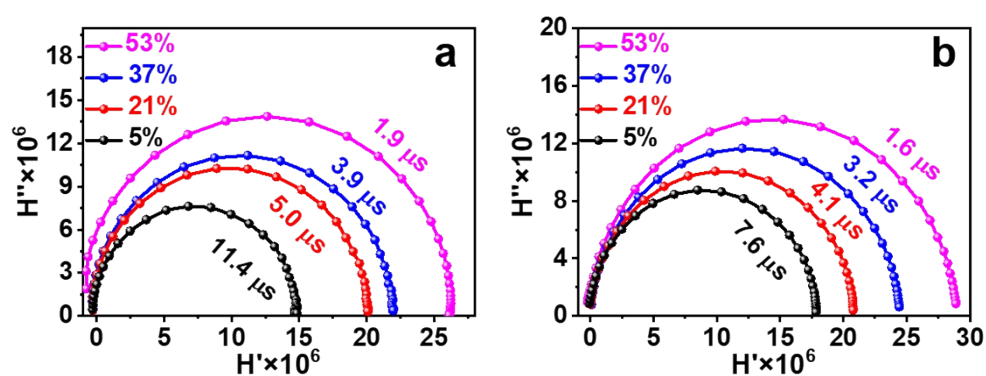

**Figure S21.** The IMPS spectra for devices based on different ETMs under different illumination intensity: (a)  $\text{SnO}_2$  and (b)  $\text{SnO}_2/\text{NbO}_x$  NCs.

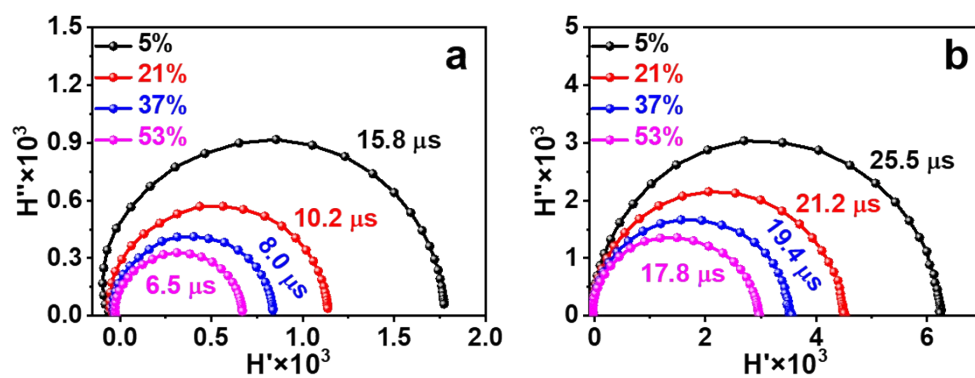

**Figure S22.** The IMVS spectra for devices on different ETMs under different illumination intensity: (a)  $\text{SnO}_2$  and (b)  $\text{SnO}_2/\text{NbO}_x$  NCs.

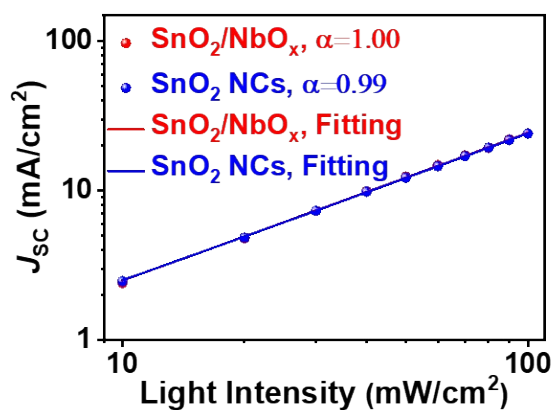

**Figure S23.** The relationship between  $J_{sc}$  versus light intensity for devices based on  $\text{SnO}_2$  and  $\text{SnO}_2/\text{NbO}_x$  NCs.

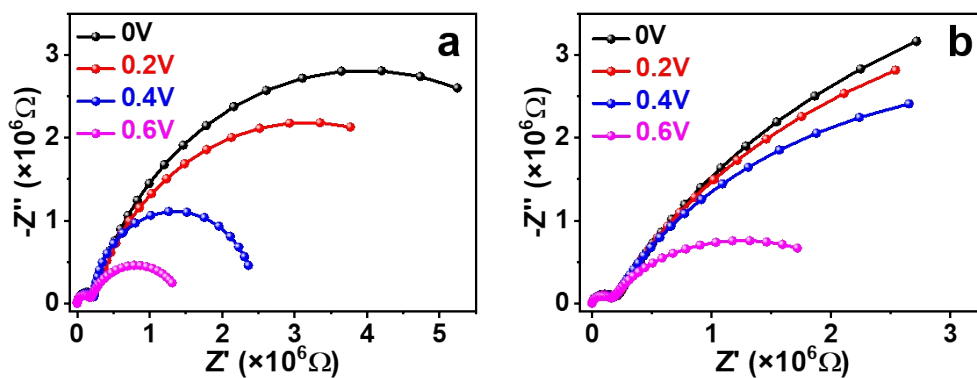

**Figure S24.** The Nyquist plots of different  $V_{bias}$  for devices based on different ETMs: (a)  $\text{SnO}_2$  and (b)  $\text{SnO}_2/\text{NbO}_x$  NCs.

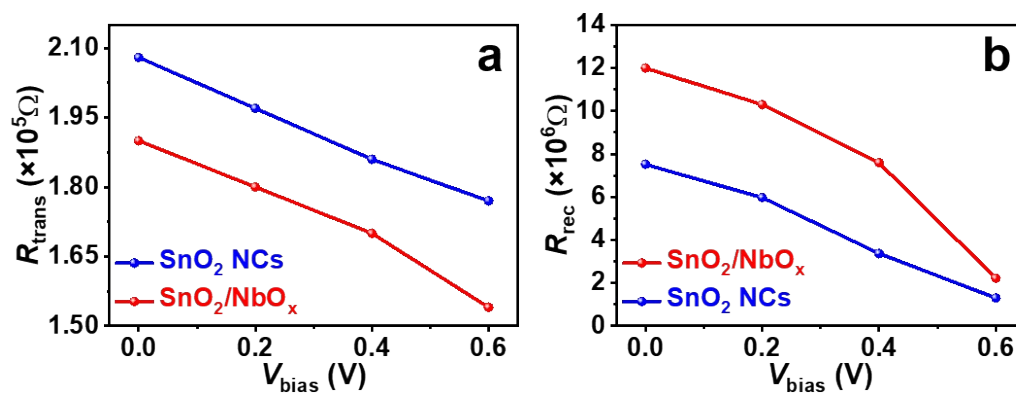

**Figure S25.** The relationship between resistance values (fitted from EIS in **Figure S18**) versus  $V_{bias}$  for devices based on  $\text{SnO}_2$  and  $\text{SnO}_2/\text{NbO}_x$  NC ETMs: (a)  $R_{trans}$  and (b)  $R_{rec}$ .



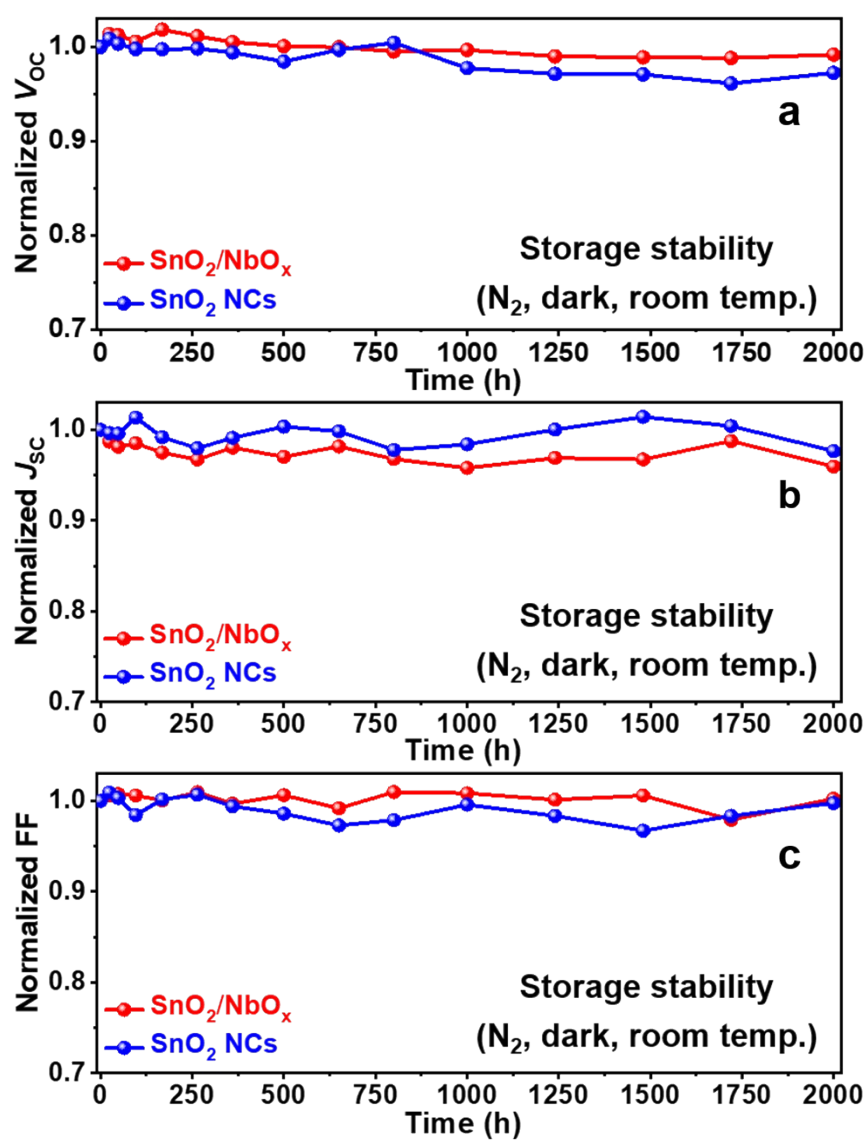

**Figure S26.** The normalized  $V_{oc}$ ,  $J_{sc}$ , and FF as a function of aging times of long-term storage stability.

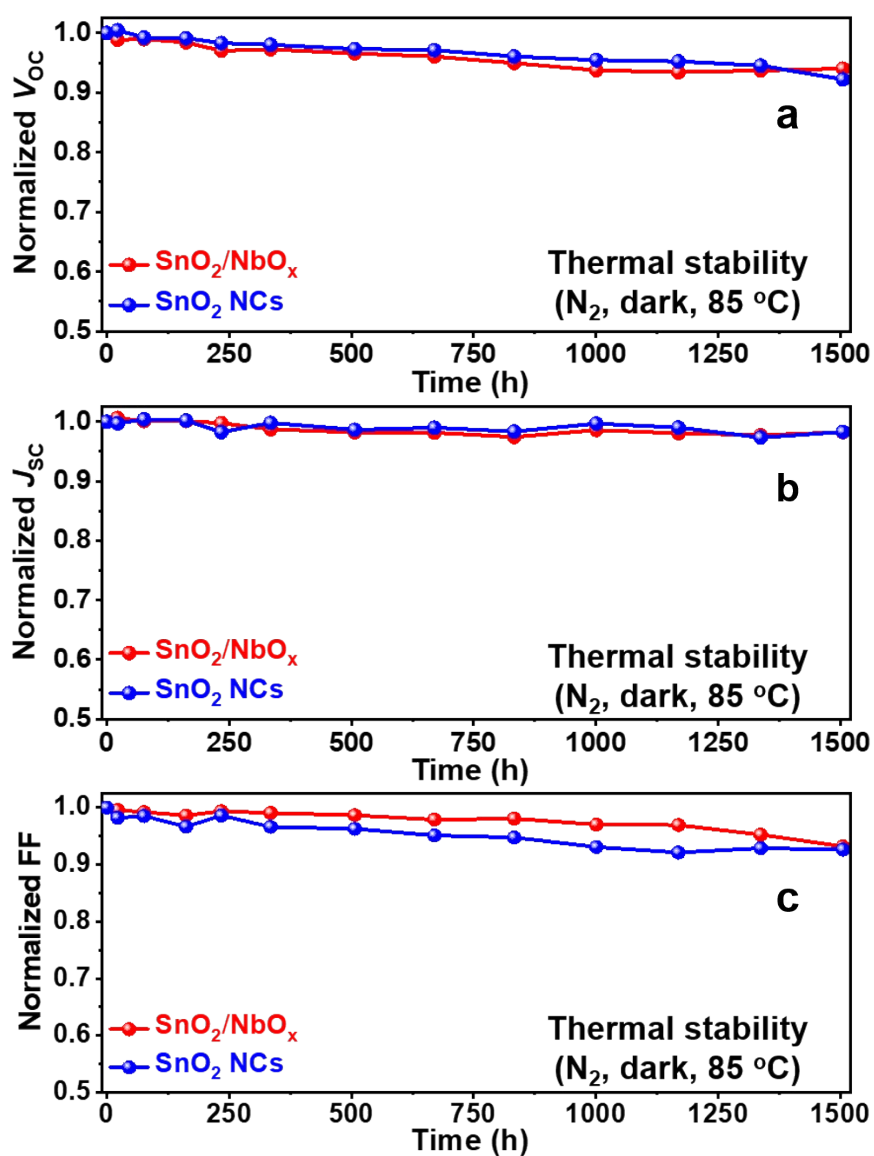

**Figure S27.** The normalized V<sub>OC</sub>, J<sub>SC</sub>, and FF as a function of aging times of thermal stability.

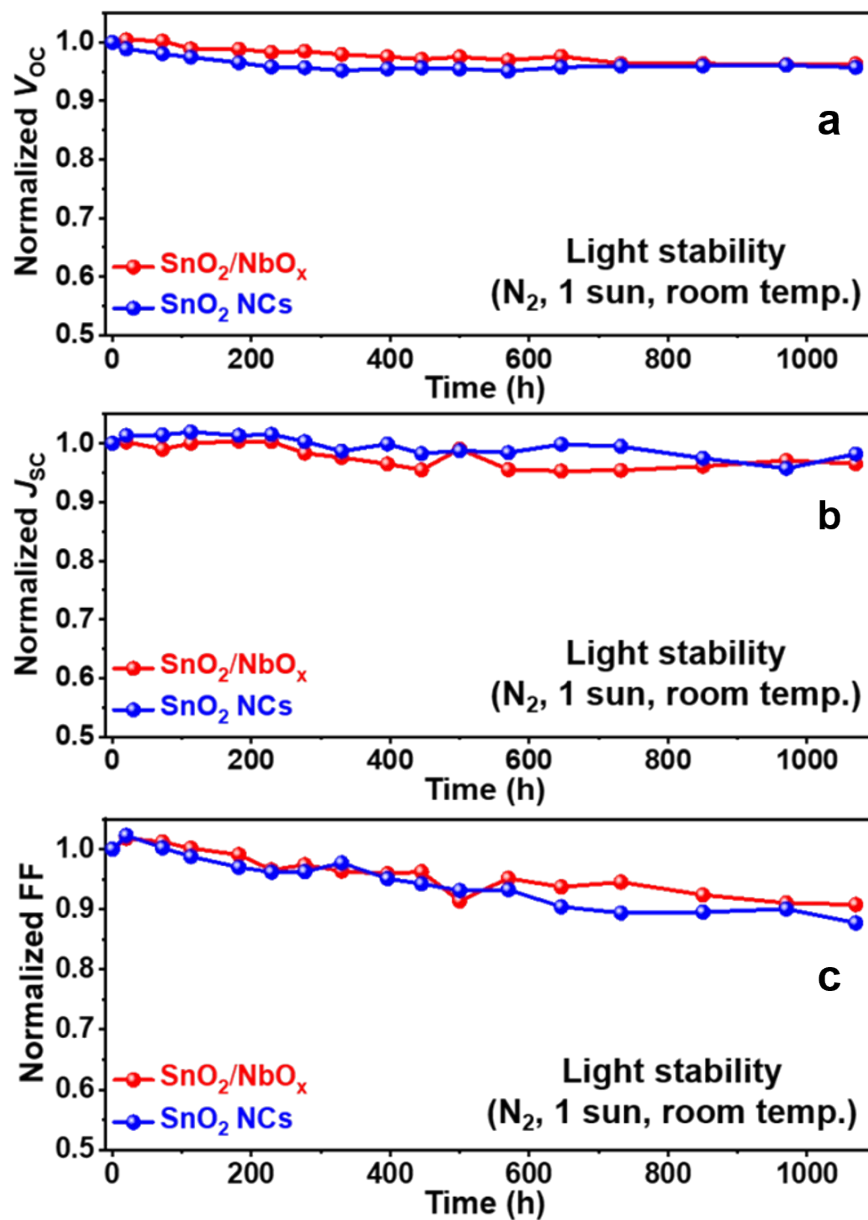

**Figure S28.** The normalized  $V_{OC}$ ,  $J_{SC}$ , and FF as a function of aging times of light soaking stability.

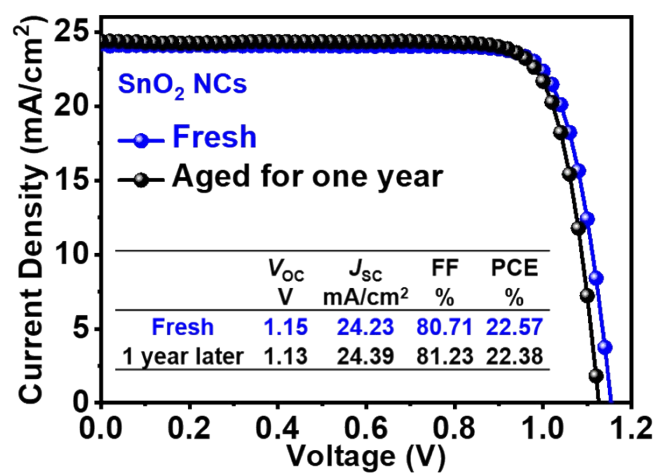

**Figure S29.** The *J*-*V* curves of devices based on fresh and aged dispersion solutions of SnO<sub>2</sub> NCs.

**Table S1.** The atomic ratio of SnO<sub>2</sub> and SnO<sub>2</sub>/NbO<sub>x</sub> NCs based on XPS survey spectrum in **Figure S7**.

| Atomic (%)                             | Cl 2p | Sn 3d | Nb 3d | O 1s  | C 1s  |
|----------------------------------------|-------|-------|-------|-------|-------|
| SnO <sub>2</sub> NCs                   | 1.00  | 11.26 | 0.27  | 39.22 | 47.53 |
| SnO <sub>2</sub> /NbO <sub>x</sub> NCs | 1.28  | 8.25  | 7.22  | 45.07 | 33.35 |

**Table S2.** The characteristic properties of SnO<sub>2</sub> and SnO<sub>2</sub>/NbO<sub>x</sub> NCs films based in **Figure 3b-f**.

| Method                                 | <i>I</i> - <i>V</i>      | SCLC                          |           | Mott-Schottky        |                       |                      |
|----------------------------------------|--------------------------|-------------------------------|-----------|----------------------|-----------------------|----------------------|
| Device<br>Structure                    | ITO/SnO <sub>2</sub> /Au | ITO/SnO <sub>2</sub> /PCBM/Au |           |                      | ITO/ SnO <sub>2</sub> |                      |
|                                        | $\sigma_0$               | $\mu$                         | $V_{TFL}$ | $N_t$                | $V_{fb}$              | $N_d$                |
|                                        | (mS/cm)                  | (cm <sup>2</sup> /V·s)        | (V)       | (cm <sup>-3</sup> )  | (V)                   | (cm <sup>-3</sup> )  |
| SnO <sub>2</sub> NCs                   | $1.03 \times 10^{-2}$    | $1.80 \times 10^{-3}$         | 0.68      | $7.5 \times 10^{17}$ | -1.64                 | $9.6 \times 10^{21}$ |
| SnO <sub>2</sub> /NbO <sub>x</sub> NCs | $1.23 \times 10^{-2}$    | $2.27 \times 10^{-3}$         | 0.51      | $5.6 \times 10^{17}$ | -1.62                 | $1.4 \times 10^{22}$ |

**Table S3.** Device performance and detailed parameters of planar n-i-p PSCs based on SnO<sub>2</sub> ETMs in **Figure S20**.

| Deposition method | Device structure                                                                                                                                                        | $J_{SC}$           | $V_{OC}$ | FF    | PCE   | Year | Ref.         |
|-------------------|-------------------------------------------------------------------------------------------------------------------------------------------------------------------------|--------------------|----------|-------|-------|------|--------------|
|                   |                                                                                                                                                                         | mA/cm <sup>2</sup> | V        | %     | %     |      |              |
| ALD               | FTO/SnO <sub>2</sub> /(FAPbI <sub>3</sub> ) <sub>0.85</sub> (MAPbBr <sub>3</sub> ) <sub>0.15</sub> /Spiro-OMeTAD/Au                                                     | 21.3               | 1.14     | 74    | 18.4  | 2015 | <sup>3</sup> |
| ALD               | FTO/SnO <sub>2</sub> /C60-SAM/MAPbI <sub>3</sub> /Spiro-OMeTAD/Au                                                                                                       | 21.56              | 1.13     | 78.11 | 19.03 | 2016 | <sup>4</sup> |
| CBD               | FTO/SnO <sub>2</sub> /PCBM/FA <sub>0.83</sub> Cs <sub>0.17</sub> Pb(I <sub>0.6</sub> Br <sub>0.4</sub> ) <sub>3</sub> /Spiro-OMeTAD/Ag                                  | 19.4               | 1.2      | 75.1  | 17.1  | 2016 | <sup>5</sup> |
| CBD               | FTO/SnO <sub>2</sub> /K <sub>x</sub> (Cs <sub>0.5</sub> (FAMA) <sub>0.95</sub> ) <sub>1-x</sub> Pb(I <sub>0.85</sub> Br <sub>0.15</sub> ) <sub>3</sub> /Spiro-OMeTAD/Au | 22.95              | 1.13     | 79    | 20.56 | 2017 | <sup>6</sup> |
| CBD               | FTO/SnO <sub>2</sub> /Cs <sub>x</sub> (MA <sub>0.17</sub> FA <sub>0.83</sub> ) <sub>1-x</sub> Pb(I <sub>0.83</sub> Br <sub>0.17</sub> ) <sub>3</sub> /Spiro-OMeTAD/Au   | 22.73              | 1.18     | 77    | 20.65 | 2016 | <sup>7</sup> |
| CBD               | ITO/SnO <sub>2</sub> /(FAPbI <sub>3</sub> ) <sub>1-x</sub> (MAPbBr <sub>3</sub> ) <sub>x</sub> /Spiro-OMeTAD/Au                                                         | 25.14              | 1.18     | 84.8  | 25.2  | 2021 | <sup>8</sup> |
| CBD               | FTO/SnO <sub>2</sub> -NH <sub>4</sub> F/(FAPbI <sub>3</sub> ) <sub>0.95</sub> (MAPbBr <sub>3</sub> ) <sub>0.05</sub> /Spir                                              | 24.6               | 1.16     | 81.4  | 23.2  | 2020 | <sup>9</sup> |



|                                                 |                                                                                                                                                                               |       |      |       |       |      |               |
|-------------------------------------------------|-------------------------------------------------------------------------------------------------------------------------------------------------------------------------------|-------|------|-------|-------|------|---------------|
| o-OMeTAD/Au                                     |                                                                                                                                                                               |       |      |       |       |      |               |
| CBD                                             | FTO/Eu:SnO <sub>2</sub> /MAPbI <sub>3</sub> /Spiro-OMeTAD/Au                                                                                                                  | 22.6  | 1.13 | 78.76 | 20.14 | 2021 | <sup>10</sup> |
| Combustion                                      | ITO/SnO <sub>2</sub> /C <sub>60</sub> -SAM/MAPbI <sub>3</sub> /Spiro-OMeTAD/Ag                                                                                                | 21.53 | 1.07 | 65    | 15.18 | 2016 | <sup>11</sup> |
| Commercial                                      | ITO/SnO <sub>2</sub> /(FAPbI <sub>3</sub> ) <sub>0.97</sub> (MAPbBr <sub>3</sub> ) <sub>0.03</sub> /Spiro-OMeTAD/Au                                                           | 24.88 | 1.09 | 75.73 | 19.9  | 2016 | <sup>12</sup> |
| Commercial                                      | ITO/SnO <sub>2</sub> /FA <sub>1-x</sub> MA <sub>x</sub> PbI <sub>3</sub> /Spiro-OMeTAD/Au                                                                                     | 25.2  | 1.18 | 78.4  | 23.32 | 2019 | <sup>2</sup>  |
| Commercial                                      | ITO/SnO <sub>2</sub> -CoCl <sub>2</sub> /(FAPbI <sub>3</sub> ) <sub>1-x</sub> (MAPbBr <sub>3</sub> ) <sub>x</sub> /Spiro-OMeTAD/Au                                            | 24.57 | 1.2  | 79.52 | 23.37 | 2021 | <sup>13</sup> |
| ITO/SnO <sub>2</sub> -                          |                                                                                                                                                                               |       |      |       |       |      |               |
| Commercial                                      | MQDs/FA <sub>0.9</sub> MA <sub>0.05</sub> Cs <sub>0.05</sub> PbI <sub>0.98</sub> Br <sub>0.02</sub> /Spiro-OMeTAD/MoO <sub>3</sub> /Au                                        | 24.96 | 1.17 | 79.8  | 23.34 | 2021 | <sup>14</sup> |
| FTO/SnO <sub>2</sub> -                          |                                                                                                                                                                               |       |      |       |       |      |               |
| Commercial                                      | ImAcHCl/(FAPbI <sub>3</sub> ) <sub>0.95</sub> (MAPbBr <sub>3</sub> ) <sub>0.05</sub> /Spiro-OMeTAD/Au                                                                         | 23.06 | 1.15 | 79    | 20.96 | 2019 | <sup>15</sup> |
| ITO/SnO <sub>2</sub> -                          |                                                                                                                                                                               |       |      |       |       |      |               |
| Commercial                                      | RCQs/Cs <sub>0.05</sub> FA <sub>0.81</sub> MA <sub>0.14</sub> PbI <sub>2.55</sub> Br <sub>0.45</sub> /Spiro-OMeTAD/MoO <sub>3</sub> /Au                                       | 24.1  | 1.14 | 82.9  | 22.77 | 2020 | <sup>16</sup> |
| Commercial                                      | ITO/In <sub>2</sub> O <sub>3</sub> /SnO <sub>2</sub> /FA <sub>1-x</sub> MA <sub>x</sub> PbI <sub>3</sub> /Spiro-OMeTAD/Au                                                     | 24.78 | 1.16 | 78.23 | 22.54 | 2020 | <sup>17</sup> |
| FTO/SnO <sub>2</sub> -(g-                       |                                                                                                                                                                               |       |      |       |       |      |               |
| Commercial                                      | CNQDs/Cs <sub>x</sub> (MA <sub>0.15</sub> FA <sub>0.85</sub> ) <sub>1-x</sub> Pb(I <sub>0.85</sub> Br <sub>0.15</sub> ) <sub>3</sub> /Spiro-OMeTAD/Au                         | 24.03 | 1.18 | 78.3  | 22.13 | 2019 | <sup>18</sup> |
| ITO/SnO <sub>2</sub> -                          |                                                                                                                                                                               |       |      |       |       |      |               |
| Commercial                                      | NH <sub>4</sub> Cl/(FAPbI <sub>3</sub> ) <sub>0.97</sub> (MAPbBr <sub>3</sub> ) <sub>0.03</sub> /Spiro-OMeTAD/Ag                                                              | 24.25 | 1.14 | 76.75 | 21.38 | 2019 | <sup>19</sup> |
| Commercial                                      | ITO/SnO <sub>2</sub> /B <sub>2</sub> Cat <sub>2</sub> /Cs <sub>1-x-y</sub> FA <sub>x</sub> MA <sub>y</sub> PbBr <sub>z</sub> I <sub>1-z</sub> /Spiro-OMeTAD/Au                | 23.7  | 1.15 | 80.98 | 22.04 | 2019 | <sup>20</sup> |
| Commercial                                      | ITO/SnO <sub>2</sub> -HP (heparin potassium)/Cs <sub>0.05</sub> FA <sub>0.85</sub> MA <sub>0.10</sub> Pb(I <sub>0.97</sub> Br <sub>0.03</sub> ) <sub>3</sub> /Spiro-OMeTAD/Au | 24.97 | 1.16 | 79.4  | 23.06 | 2020 | <sup>21</sup> |
| Commercial                                      | ITO/SnO <sub>2</sub> /KPF6/Rb <sub>0.05</sub> (FA <sub>0.95</sub> MA <sub>0.05</sub> ) <sub>0.95</sub> PbI <sub>2.85</sub> Br <sub>0.15</sub> /Spiro-OMeTAD/Au                | 22.83 | 1.14 | 81.8  | 21.39 | 2021 | <sup>22</sup> |
| ITO/SnO <sub>2</sub> -                          |                                                                                                                                                                               |       |      |       |       |      |               |
| Commercial                                      | EDTA/FA <sub>0.95</sub> Cs <sub>0.05</sub> PbI <sub>3</sub> /Spiro-OMeTAD/Au                                                                                                  | 24.46 | 1.11 | 79    | 21.52 | 2018 | <sup>23</sup> |
| ITO/SnO <sub>2</sub> /C9 (fullerene derivative) |                                                                                                                                                                               |       |      |       |       |      |               |
| Commercial                                      | /(FAPbI <sub>3</sub> ) <sub>x</sub> (MAPbBr <sub>3</sub> ) <sub>1-x</sub> /Spiro-OMeTAD/Au                                                                                    | 24.1  | 1.12 | 78.9  | 21.3  | 2018 | <sup>24</sup> |
| Commercial                                      | ITO/SnO <sub>2</sub> -GDY (Graphdiyne)/Cs <sub>x</sub> MA <sub>y</sub> FA <sub>1-x-y</sub> PbI <sub>z</sub> Br <sub>3-z</sub> /Spiro-OMeTAD/Au                                | 23.32 | 1.14 | 79.62 | 21.11 | 2020 | <sup>25</sup> |

|                        |                                                                                                                                                                                           |       |      |       |       |      |    |
|------------------------|-------------------------------------------------------------------------------------------------------------------------------------------------------------------------------------------|-------|------|-------|-------|------|----|
|                        | ITO/SnO <sub>2</sub> -                                                                                                                                                                    |       |      |       |       |      |    |
| Commercial             | KCl/(FAPbI <sub>3</sub> ) <sub>0.95</sub> (MAPbBr <sub>3</sub> ) <sub>0.05</sub> /Spiro-OMeTAD/Au                                                                                         | 24.2  | 1.14 | 80.7  | 22.2  | 2019 | 26 |
| Commercial             | ITO/SnO <sub>2</sub> /RbF/(FAPbI <sub>3</sub> ) <sub>0.95</sub> (MAPbBr <sub>3</sub> ) <sub>0.05</sub> /Spiro-OMeTAD/Au                                                                   | 24.32 | 1.21 | 79.29 | 23.38 | 2021 | 27 |
| Commercial             | ITO/SnO <sub>2</sub> /FAPbI <sub>3</sub> /Spiro-OMeTAD/Au                                                                                                                                 | 24.4  | 1.16 | 81.3  | 23.1  | 2020 | 28 |
| Commercial             | ITO/SnO <sub>2</sub> /FAPbI <sub>3</sub> /Spiro-OMeTAD/MoO <sub>3</sub> /Au                                                                                                               | 25.34 | 1.17 | 81.36 | 24.1  | 2021 | 29 |
| Commercial             | ITO/H <sub>2</sub> O <sub>2</sub> -SnO <sub>2</sub> /(FAPbI <sub>3</sub> ) <sub>1-x</sub> (MAPbBr <sub>3</sub> ) <sub>x</sub> /Spiro-OMeTAD/Au                                            | 24.22 | 1.16 | 78.96 | 22.15 | 2020 | 30 |
| Commercial             | FTO/ SnO <sub>2</sub> -CdS QD /MAPbI <sub>3</sub> /Spiro-OMeTAD/Ag                                                                                                                        | 23.45 | 1.13 | 78.42 | 20.78 | 2021 | 31 |
| E-beam evaporation     | FTO/SnO <sub>2</sub> /Cs <sub>0.05</sub> (MA <sub>0.17</sub> FA <sub>0.83</sub> ) <sub>0.95</sub> Pb(I <sub>0.83</sub> Br <sub>0.17</sub> ) <sub>3</sub> /Spiro-OMeTAD/Au                 | 22.75 | 1.09 | 73    | 18.2  | 2017 | 32 |
| Electro-deposited      | ITO/SnO <sub>2</sub> /MAPbI <sub>3</sub> /Spiro-OMeTAD/Ag                                                                                                                                 | 19.75 | 1.08 | 65    | 13.88 | 2017 | 33 |
| PLD                    | FTO/SnO <sub>2</sub> /PCBM/MAPbI <sub>3</sub> /Spiro-OMeTAD/Au                                                                                                                            | 21.6  | 1.11 | 71    | 17.03 | 2017 | 34 |
| Sol-gel                | FTO/SnO <sub>2</sub> /MAPbI <sub>3</sub> /Spiro-OMeTAD/Au                                                                                                                                 | 23.27 | 1.11 | 67    | 17.21 | 2015 | 35 |
| Sol-gel                | ITO/SnO <sub>2</sub> /MAPbI <sub>3</sub> /Spiro-OMeTAD/Au                                                                                                                                 | 21.74 | 1.15 | 80.9  | 20.23 | 2017 | 36 |
| Sol-gel                | FTO/SnO <sub>2</sub> /(FAPbI <sub>3</sub> ) <sub>0.85</sub> (MAPbBr <sub>3</sub> ) <sub>0.15</sub> /Spiro-OMeTAD/Au                                                                       | 22.54 | 1.15 | 74    | 19.18 | 2017 | 37 |
| Sol-gel                | FTO/Mg:SnO <sub>2</sub> /MAPbI <sub>3</sub> /Spiro-OMeTAD/Au                                                                                                                              | 21.44 | 1.00 | 70.8  | 15.24 | 2016 | 38 |
| Sol-gel                | FTO/Nb:SnO <sub>2</sub> /MAPbI <sub>3</sub> /Spiro-OMeTAD/Au                                                                                                                              | 22.36 | 1.08 | 72.7  | 17.57 | 2017 | 39 |
| Sol-gel                | FTO/Li:SnO <sub>2</sub> /MAPbI <sub>3</sub> /Spiro-OMeTAD/Au                                                                                                                              | 23.27 | 1.1  | 70.7  | 18.2  | 2016 | 40 |
| Sol-gel                | ITO/SnO <sub>2</sub> :GQDs/MAPbI <sub>3</sub> /Spiro-OMeTAD/Au                                                                                                                            | 23.05 | 1.13 | 77.8  | 20.31 | 2017 | 41 |
| Sol-gel                | FTO/SnO <sub>2</sub> :FAl/Cs <sub>0.04</sub> (FA <sub>0.84</sub> MA <sub>0.16</sub> ) <sub>0.9</sub> <sub>6</sub> Pb(I <sub>0.84</sub> Br <sub>0.16</sub> ) <sub>3</sub> /Spiro-OMeTAD/Au | 23.2  | 1.18 | 80.8  | 22.2  | 2021 | 42 |
| Solution-processed NPs | FTO/SnO <sub>2</sub> /MAPbI <sub>3</sub> /Spiro-OMeTAD/Au                                                                                                                                 | 21.19 | 1.02 | 67.8  | 14.69 | 2015 | 43 |
| Solution-processed NPs | FTO/SnO <sub>2</sub> /Cs <sub>0.05</sub> (MA <sub>0.17</sub> FA <sub>0.83</sub> ) <sub>0.95</sub> Pb(I <sub>0.83</sub> Br <sub>0.17</sub> ) <sub>3</sub> /Spiro-OMeTAD/Au                 | 23.05 | 1.13 | 79.8  | 20.79 | 2018 | 44 |
| Solution-processed NPs | ITO/Sb:SnO <sub>2</sub> /MAPbI <sub>3</sub> /Spiro-OMeTAD/Au                                                                                                                              | 22.6  | 1.06 | 72    | 17.2  | 2016 | 45 |

|                        |                                                                                                                                                                                 |       |      |       |       |      |               |
|------------------------|---------------------------------------------------------------------------------------------------------------------------------------------------------------------------------|-------|------|-------|-------|------|---------------|
| Solution-processed NPs | FTO/SnO <sub>2</sub> /KPF <sub>6</sub> /(Csl) <sub>0.04</sub> (FAI) <sub>0.82</sub> (PbI <sub>2</sub> ) <sub>0.86</sub> (MAPbBr <sub>3</sub> ) <sub>0.14</sub> /Spiro-OMeTAD/Au | 23.15 | 1.12 | 81.2  | 21.05 | 2021 | <sup>46</sup> |
| This work              | ITO/SnO <sub>2</sub> /FA <sub>1-x</sub> MA <sub>x</sub> PbI <sub>3-y</sub> Cl <sub>y</sub> /Spiro-OMeTAD/Au                                                                     | 24.79 | 1.16 | 80.09 | 23.01 | 2021 | This work     |
| This work              | ITO/SnO <sub>2</sub> /NbO <sub>x</sub> /FA <sub>1-x</sub> MA <sub>x</sub> PbI <sub>3-y</sub> Cl <sub>y</sub> /Spiro-OMeTAD/Au                                                   | 24.95 | 1.18 | 81.58 | 24.01 | 2021 | This work     |

**Table S4.** Parameters of the TRPL spectroscopy based on perovskite films spin-coated on different substrates in **Figure 5b**.

| Substrate                              | $y_0$  | $\tau_1$ (ns) | $A_1$ | $\tau_2$ (ns) | $A_2$ | $\tau_{ave}$ (ns) |
|----------------------------------------|--------|---------------|-------|---------------|-------|-------------------|
| glass                                  | 0.016  | 128.1         | 0.42  | 4725          | 0.51  | 2463              |
| SnO <sub>2</sub> NCs                   | 0.0029 | 95.5          | 0.38  | 332.5         | 0.74  | 297.0             |
| SnO <sub>2</sub> /NbO <sub>x</sub> NCs | 0.0016 | 65.8          | 0.59  | 363.7         | 0.58  | 249.7             |

**Table S5.** EIS fitting parameters of the devices based on SnO<sub>2</sub> and SnO<sub>2</sub>/NbO<sub>x</sub> NCs in **Figure 5f** and **Figure S24**.

|                                        | $V_{bias}$<br>(V) | $R_s$<br>(Ohm) | $C_1$<br>(F)           | $R_{tr}$<br>(Ohm)     | $C_2$<br>(F)          | $R_{rec}$<br>(Ohm)    |
|----------------------------------------|-------------------|----------------|------------------------|-----------------------|-----------------------|-----------------------|
| SnO <sub>2</sub> NCs                   | 0                 | 38.12          | $9.13 \times 10^{-9}$  | $2.08 \times 10^{-5}$ | $2.18 \times 10^{-5}$ | $7.52 \times 10^{-6}$ |
|                                        | 0.2               | 44.28          | $8.77 \times 10^{-9}$  | $1.97 \times 10^{-5}$ | $3.28 \times 10^{-5}$ | $5.97 \times 10^{-6}$ |
|                                        | 0.4               | 30.01          | $8.78 \times 10^{-9}$  | $1.86 \times 10^{-5}$ | $3.95 \times 10^{-5}$ | $3.37 \times 10^{-6}$ |
|                                        | 0.6               | 37.02          | $8.63 \times 10^{-9}$  | $1.77 \times 10^{-5}$ | $4.79 \times 10^{-5}$ | $1.30 \times 10^{-6}$ |
| SnO <sub>2</sub> /NbO <sub>x</sub> NCs | 0                 | 27.96          | $9.78 \times 10^{-9}$  | $1.90 \times 10^{-5}$ | $5.05 \times 10^{-5}$ | $1.20 \times 10^{-6}$ |
|                                        | 0.2               | 27.67          | $1.03 \times 10^{-9}$  | $1.80 \times 10^{-5}$ | $5.45 \times 10^{-5}$ | $1.03 \times 10^{-6}$ |
|                                        | 0.4               | 27.71          | $9.85 \times 10^{-10}$ | $1.70 \times 10^{-5}$ | $5.28 \times 10^{-5}$ | $7.59 \times 10^{-6}$ |
|                                        | 0.6               | 27.84          | $9.91 \times 10^{-9}$  | $1.54 \times 10^{-5}$ | $6.00 \times 10^{-5}$ | $2.22 \times 10^{-6}$ |

## References

1. B. Bob, T.-B. Song, C.-C. Chen, Z. Xu and Y. Yang, *Chem. Mater.*, 2013, **25**, 4725-4730.
2. Q. Jiang, Y. Zhao, X. W. Zhang, X. L. Yang, Y. Chen, Z. M. Chu, Q. F. Ye, X. X. Li, Z. G. Yin and J. B. You, *Nat. Photonics*, 2019, **13**, 460-466.
3. J. P. C. Baena, L. Steier, W. Tress, M. Saliba, S. Neutzner, T. Matsui, F. Giordano, T. J. Jacobsson, A. R. S. Kandada, S. M. Zakeeruddin, A. Petrozza, A. Abate, M. K. Nazeeruddin, M. Gratzel and A. Hagfeldt, *Energy Environ. Sci.*, 2015, **8**, 2928-2934.
4. C. L. Wang, D. W. Zhao, C. R. Grice, W. Q. Liao, Y. Yu, A. Cimaroli, N. Shrestha, P. J. Roland, J. Chen, Z. H. Yu, P. Liu, N. Cheng, R. J. Ellingson, X. Z. Zhao and Y. F. Yan, *J. Mater. Chem. A*, 2016, **4**, 12080-12087.
5. D. P. McMeekin, G. Sadoughi, W. Rehman, G. E. Eperon, M. Saliba, M. T. Horantner, A. Haghighirad, N. Sakai, L. Korte, B. Rech, M. B. Johnston, L. M. Herz and H. J. Snaith, *Science*, 2016, **351**, 151-155.
6. T. L. Bu, X. P. Liu, Y. Zhou, J. P. Yi, X. Huang, L. Luo, J. Y. Xiao, Z. L. Ku, Y. Peng, F. Z. Huang, Y. B. Cheng and J. Zhong, *Energy Environ. Sci.*, 2017, **10**, 2509-2515.
7. E. H. Anaraki, A. Kermanpur, L. Steier, K. Domanski, T. Matsui, W. Tress, M. Saliba, A. Abate, M. Gratzel, A. Hagfeldt and J. P. Correa-Baena, *Energy Environ. Sci.*, 2016, **9**, 3128-3134.
8. J. J. Yoo, G. Seo, M. R. Chua, T. G. Park, Y. L. Lu, F. Rotermund, Y. K. Kim, C. S. Moon, N. J. Jeon, J. P. Correa-Baena, V. Bulovic, S. S. Shin, M. G. Bawendi and J. Seo, *Nature*, 2021, **590**, 587-593.
9. E. H. Jung, B. Chen, K. Bertens, M. Vafaie, S. Teale, A. Proppe, Y. Hou, T. Zhu, C. Zheng and E. H. Sargent, *ACS Energy Lett.*, 2020, **5**, 2796-2801.
10. Y. L. Chen, X. J. Zuo, Y. Y. He, F. Qian, S. N. Zuo, Y. L. Zhang, L. Liang, Z. Q. Chen, K. Zhao, Z. K. Liu, J. Gou and S. Z. Liu, *Adv. Sci.*, 2021, **8**, 2001466.
11. X. Liu, K.-W. Tsai, Z. Zhu, Y. Sun, C.-C. Chueh and A. K. Y. Jen, *Adv. Mater. Interfaces*, 2016, **3**, 1600122.
12. Q. Jiang, L. Q. Zhang, H. L. Wang, X. L. Yang, J. H. Meng, H. Liu, Z. G. Yin, J. L. Wu, X. W. Zhang and J. B. You, *Nat. Energy*, 2017, **2**, 16177.
13. P. Wang, B. Chen, R. Li, S. Wang, N. Ren, Y. Li, S. Mazumdar, B. Shi, Y. Zhao and X. Zhang, *ACS Energy Lett.*, 2021, **6**, 2121-2128.
14. Y. G. Yang, H. Z. Lu, S. L. Feng, L. F. Yang, H. Dong, J. O. Wang, C. Tian, L. N. Li, H. L. Lu, J. Jeong, S. M. Zakeeruddin, Y. H. Liu, M. Gratzel and A. Hagfeldt, *Energy Environ. Sci.*, 2021, **14**, 3447-3454.
15. J. Chen, X. Zhao, S. G. Kim and N. G. Park, *Adv. Mater.*, 2019, **31**, 1902902.
16. W. Hui, Y. G. Yang, Q. Xu, H. Gu, S. L. Feng, Z. H. Su, M. R. Zhang, J. O. Wang, X. D. Li, J. F. Fang, F. Xia, Y. D. Xia, Y. H. Chen, X. Y. Gao and W. Huang, *Adv. Mater.*, 2020, **32**, 1906374.
17. P. Y. Wang, R. J. Li, B. B. Chen, F. H. Hou, J. Zhang, Y. Zhao and X. D. Zhang, *Adv. Mater.*, 2020, **32**, 1905766.
18. J. B. Chen, H. Dong, L. Zhang, J. R. Li, F. H. Jia, B. Jiao, J. Xu, X. Hou, J. Liu and Z. X. Wu, *J. Mater. Chem. A*, 2020, **8**, 2644-2653.
19. Z. Z. Liu, K. M. Deng, J. Hu and L. Li, *Angew. Chem. Int. Ed.*, 2019, **58**, 11497-11504.
20. N. Li, X. Niu, F. Pei, H. Liu, Y. Cao, Y. Liu, H. Xie, Y. Gao, Q. Chen, F. Mo and H. Zhou, *Sol. RRL*, 2020, **4**, 1900217.
21. S. You, H. Zeng, Z. Ku, X. Wang, Z. Wang, Y. Rong, Y. Zhao, X. Zheng, L. Luo, L. Li, S. Zhang, M. Li, X. Gao and X. Li, *Adv. Mater.*, 2020, **32**, 2003990.
22. H. Bi, B. Liu, D. He, L. Bai, W. Wang, Z. Zang and J. Chen, *Chem. Eng. J.*, 2021, **418**, 129375.
23. D. Yang, R. X. Yang, K. Wang, C. C. Wu, X. J. Zhu, J. S. Feng, X. D. Ren, G. J. Fang, S. Priya and S. Z. Liu, *Nat. Commun.*, 2018, **9**, 3239.
24. K. Liu, S. Chen, J. H. Wu, H. Y. Zhang, M. C. Qin, X. H. Lu, Y. F. Tu, Q. B. Meng and X. W. Zhan, *Energy Environ. Sci.*, 2018, **11**, 3463-3471.

25. S. Zhang, H. Si, W. Fan, M. Shi, M. Li, C. Xu, Z. Zhang, Q. Liao, A. Sattar, Z. Kang and Y. Zhang, *Angew. Chem. Int. Ed.*, 2020, **59**, 11573-11582.
26. P. Zhu, S. Gu, X. Luo, Y. Gao, S. Li, J. Zhu and H. Tan, *Adv. Energy Mater.*, 2020, **10**, 1903083.
27. J. Zhuang, P. Mao, Y. Luan, N. Chen, X. Cao, G. Niu, F. Jia, F. Wang, S. Cao and J. Wang, *Adv. Funct. Mater.*, 2021, **31**, 2010385.
28. H. Lu, Y. Liu, P. Ahlawat, A. Mishra, W. R. Tress, F. T. Eickemeyer, Y. Yang, F. Fu, Z. Wang, C. E. Avalos, B. I. Carlsen, A. Agarwalla, X. Zhang, X. Li, Y. Zhan, S. M. Zakeeruddin, L. Emsley, U. Rothlisberger, L. Zheng, A. Hagfeldt and M. Grätzel, *Science*, 2020, **370**, eabb8985.
29. W. Hui, L. F. Chao, H. Lu, F. Xia, Q. Wei, Z. H. Su, T. T. Niu, L. Tao, B. Du, D. L. Li, Y. Wang, H. Dong, S. W. Zuo, B. X. Li, W. Shi, X. Q. Ran, P. Li, H. Zhang, Z. B. Wu, C. X. Ran, L. Song, G. C. Xing, X. Y. Gao, J. Zhang, Y. D. Xia, Y. H. Chen and W. Huang, *Science*, 2021, **371**, 1359-1364.
30. H. B. Wang, H. G. Liu, F. H. Ye, Z. L. Chen, J. J. Ma, J. W. Liang, X. L. Zheng, C. Tao and G. J. Fang, *J. Power Sources*, 2021, **481**, 229160.
31. Z. Lv, L. He, H. P. Jiang, X. J. Ma, F. Y. Wang, L. Fan, M. B. Wei, J. H. Yang, L. L. Yang and N. N. Yang, *ACS Appl. Mater. Interfaces*, 2021, **13**, 16326-16335.
32. J. Ma, X. Zheng, H. Lei, W. Ke, C. Chen, Z. Chen, G. Yang and G. Fang, *Sol. RRL*, 2017, **1**, 1700118.
33. J.-Y. Chen, C.-C. Chueh, Z. Zhu, W.-C. Chen and A. K. Y. Jen, *Sol. Energy Mater. Sol. Cells*, 2017, **164**, 47-55.
34. Z. Chen, G. Yang, X. Zheng, H. Lei, C. Chen, J. Ma, H. Wang and G. Fang, *J. Power Sources*, 2017, **351**, 123-129.
35. W. J. Ke, G. J. Fang, Q. Liu, L. B. Xiong, P. L. Qin, H. Tao, J. Wang, H. W. Lei, B. R. Li, J. W. Wan, G. Yang and Y. F. Yan, *J. Am. Chem. Soc.*, 2015, **137**, 6730-6733.
36. L. Zuo, H. Guo, D. W. deQuilettes, S. Jariwala, N. De Marco, S. Dong, R. DeBlock, D. S. Ginger, B. Dunn, M. Wang and Y. Yang, *Sci. Adv.*, 2017, **3**, e1700106.
37. Q. Dong, Y. Shi, C. Zhang, Y. Wu and L. Wang, *Nano Energy*, 2017, **40**, 336-344.
38. L. B. Xiong, M. C. Qin, G. Yang, Y. X. Guo, H. W. Lei, Q. Liu, W. J. Ke, H. Tao, P. L. Qin, S. Z. Li, H. Q. Yu and G. J. Fang, *J. Mater. Chem. A*, 2016, **4**, 8374-8383.
39. X. D. Ren, D. Yang, Z. Yang, J. S. Feng, X. J. Zhu, J. Z. Niu, Y. C. Liu, W. G. Zhao and S. F. Liu, *ACS Appl. Mater. Interfaces*, 2017, **9**, 2421-2429.
40. M. Park, J. Y. Kim, H. J. Son, C. H. Lee, S. S. Jang and M. J. Ko, *Nano Energy*, 2016, **26**, 208-215.
41. J. S. Xie, K. Huang, X. G. Yu, Z. R. Yang, K. Xiao, Y. P. Qiang, X. D. Zhu, L. B. Xu, P. Wang, C. Cui and D. R. Yang, *ACS Nano*, 2017, **11**, 9176-9182.
42. Q. S. Dong, C. Zhu, M. Chen, C. Jiang, J. Y. Guo, Y. L. Feng, Z. H. Dai, S. K. Yadavalli, M. Y. Hu, X. Cao, Y. Q. Li, Y. Z. Huang, Z. Liu, Y. T. Shi, L. D. Wang, N. P. Padture and Y. Y. Zhou, *Nat. Commun.*, 2021, **12**, 973.
43. H. S. Rao, B. X. Chen, W. G. Li, Y. F. Xu, H. Y. Chen, D. B. Kuang and C. Y. Su, *Adv. Funct. Mater.*, 2015, **25**, 7200-7207.
44. G. Yang, C. Chen, F. Yao, Z. L. Chen, Q. Zhang, X. L. Zheng, J. J. Ma, H. W. Lei, P. L. Qin, L. B. Xiong, W. J. Ke, G. Li, Y. F. Yan and G. J. Fang, *Adv. Mater.*, 2018, **30**, 1706023.
45. A. Agresti, S. Pescetelli, L. Cina, D. Konios, G. Kakavelakis, E. Kymakis and A. Di Carlo, *Adv. Funct. Mater.*, 2016, **26**, 2686-2694.
46. Z. C. Wang, T. Wu, L. Xiao, P. L. Qin, X. L. Yu, L. Ma, L. Xiong, H. X. Li, X. B. Chen, Z. Wang, T. Wu, L. Xiao, P. Qin, X. Yu, L. Ma, L. Xiong, H. Li and X. Chen, *J. Power Sources*, 2021, **488**, 229451.
